# Supplementary material for: Dissecting the Genetic Basis of the Technological, Functional, and Safety Characteristics of Lacticaseibacillus paracasei SRX10
Source: MDPI journal article supplement (doi:10.3390/microorganisms12010093), 2024-01-02
Supplement: s1 [file s1]

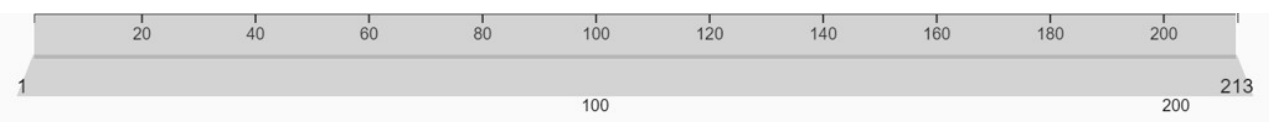

Family

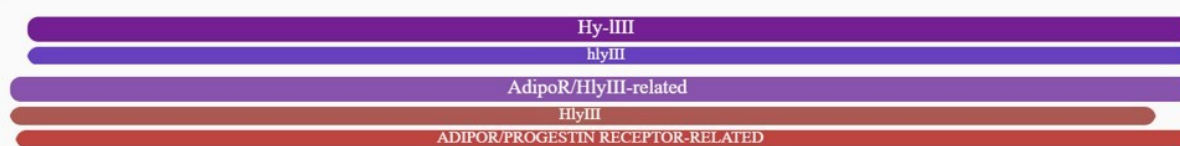

**F** IPR005744  
TIGR01065  
**F** IPR004254  
PF03006  
PTHR20855

Other Features

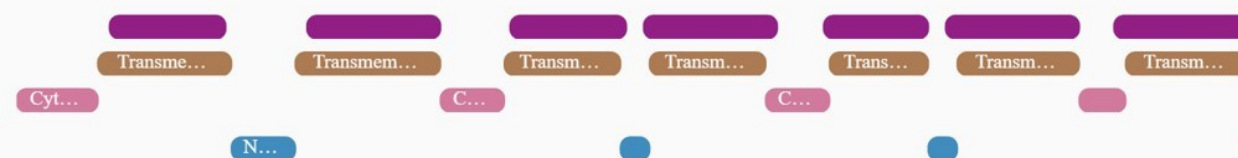

TMHMM: TMhelix  
PHOBIUS: TRANSMEMBRANE  
PHOBIUS: CYTOPLASMIC DOM  
PHOBIUS: NON CYTOPLASMIC
