# Supplementary figures and images for: Dissecting the Genetic Basis of the Technological, Functional, and Safety Characteristics of Lacticaseibacillus paracasei SRX10
Source: MDPI journal article supplement (doi:10.3390/microorganisms12010093), 2024-01-02

**A**

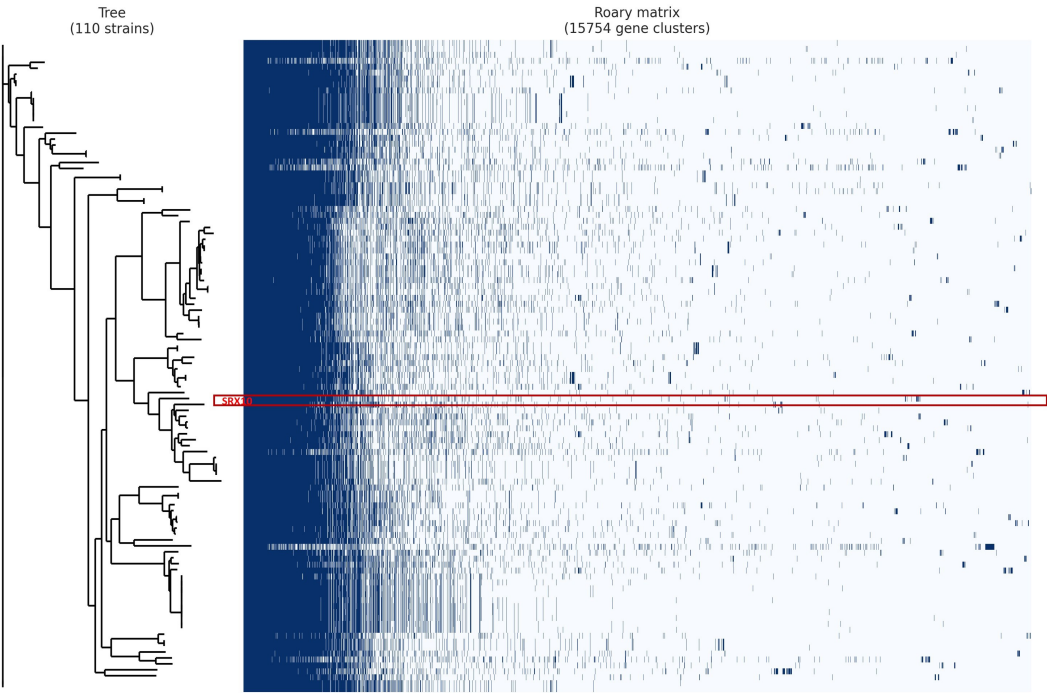

**B**

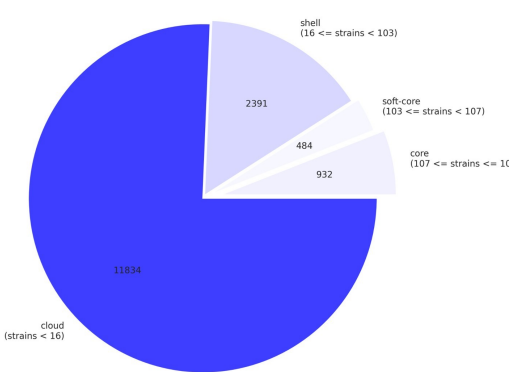

Supplement: s1 [file s1]
